# Supplementary material for: Intradermal Botulinum Toxin A on Skin Quality and Facial Rejuvenation: A Systematic Review and Meta-analysis
Source: PubMed Central journal article supplement — Plast Reconstr Surg Glob Open. 2024 Aug 23;12(8):e6084. doi: 10.1097/GOX.0000000000006084 (PMC11343530; doi:10.1097/gox.0000000000006084), 2024-08-23
Supplement: gox-12-e6084-s001.pdf [file gox-12-e6084-s001.pdf]

## SDC 1

### Pubmed

#1:

((Botulinum toxin A[MeSH Major Topic]) OR (Onabotulinum toxin A) OR (Botox) OR (Vistabel) OR (Abobotulinum toxin A) OR (Dysport) OR (Incobotulinum toxin A) OR (Xeomin) )))

#2:

(Intradermal injection) OR (Microbotox) OR (Mesobotox)

#3:

Facial rejuvenation

#4

Sebum production OR Oily Skin OR Pore size OR Erythema Index OR Skin Hydration OR skin Quality OR Wrinkle OR Face lift

#5

#1 AND #2 AND #3

#6

#1 AND #2 AND #4

#7

#1 AND #2 AND #3 AND #4

### Embase

#1:

'Onabotulinum toxin A' : ab,ti OR 'Botox' :ab,ti OR 'Vistabel':ab,ti OR 'Abobotulinum toxin A' : ab, ti OR 'Dysport' : ab, ti OR 'Incobotulinum toxin A' : ab, ti OR 'Xeomin' : ab, ti

#2:

'Intradermal Injection' : ab,ti OR 'Microbotox' : ab, ti OR 'Mesobotox' : ab, ti

#3:

'Facial Rejuvenation' : ab,ti

#4

'Sebum production' : ab, tl OR 'Oily Skin' : ab, tl OR 'Pore size' : ab, tl OR 'Erythema Index' ab, tl OR 'Skin Hydration' : ab, tl OR 'Skin Quality' : ab, tl OR 'Wrinkle' : ab, tl OR 'Face lift' : ab, tl

#5

#1 AND #2 AND #3

#6

#1 AND #2 AND #4

#7

#1 AND #2 AND #3 AND #4

### Cochrane

#1:

(Onabotulinum toxin A ) :ti,ab,kw OR (Botox) :ti,ab,kw OR (Vistabel): :ti,ab,kw OR (Abobotulinum toxin A) :ti,ab,kw OR (Dysport) :ti,ab,kw OR (Incobotulinum toxin A) :ti,ab,kw OR (Xeomin) :ti,ab,kw

#2:

'Intradermal Injection' :ti,ab,kw OR 'Mesobotox' :ti,ab,kw OR 'Mocrobotox' :ti,ab,kw OR

#3:

'Facial Rejuvenation' :ti,ab,kw

#4:

'Sebum production' :ti,ab,kw OR 'Oily Skin' :ti,ab,kw OR 'Pore size' :ti,ab,kw OR 'Erythema Index' :ti,ab,kw OR 'Skin Hydration' :ti,ab,kw OR 'Skin Quality' :ti,ab,kw OR 'Wrinkle' :ti,ab,kw OR 'Face lift' :ti,ab,kw

#5

#1 AND #2 AND #3

#6  
#1 AND #2 and #4

#7  
#1 AND #2 AND #3 AND #4
